# Supplementary material for: Step-by-step synthesis of one Fe6 wheel and two Fe10 clusters derived from a multidentate triethanolamine ligand
Source: Royal Society of Chemistry journal article supplement (doi:10.1039/c3ce42381f), 2014-01-01
Supplement: c3ce42381f1.pdf [file c3ce42381f1.pdf]

*Electronic Supplementary Information (ESI)*

**Step-by-step synthesis of one Fe<sub>6</sub> wheel and two Fe<sub>10</sub> clusters derived from multidentate triethanoamine ligand**

**Sui-Jun Liu,<sup>a</sup> Song-De Han,<sup>a</sup> Ji-Min Jia,<sup>a</sup> Li Xue,<sup>a</sup> Yu Cui,<sup>a</sup> Shu-Ming Zhang,<sup>b</sup> and Ze Chang<sup>a\*</sup>**

*<sup>a</sup>Key Laboratory of Advanced Energy Materials Chemistry (Ministry of Education), Department of Chemistry, TKL of Metal- and Molecule-Based Material Chemistry and Collaborative Innovation Center of Chemical Science and Engineering (Tianjin), Nankai University, Tianjin 300071, P.R. China.*

*<sup>b</sup>School of Chemical Engineering and Technology, Hebei University of Technology, Tianjin 300130, P. R. China.*

---

\*Corresponding author. E-mail: [changze@nankai.edu.cn](mailto:changze@nankai.edu.cn). Fax: +86-22-23502458

## Experimental Section

**Materials and methods.** All chemicals were of reagent grade and were used as purchased without further purification. Elemental analysis (C and H) was performed on a Perkin-Elmer 240C analyzer (Perkin-Elmer, USA).  $[\text{Fe}_3\text{O}(\text{HCO}_2)_6(\text{H}_2\text{O})_3]\cdot\text{NO}_3$  and  $[\text{Fe}_3\text{O}(\text{HCOO})_6(\text{H}_2\text{O})_3]\cdot\text{Cl}$  were prepared using the procedures reported previously with small modification.<sup>S1</sup> The XRPD spectrum was recorded on a Rigaku D/Max-2500 diffractometer at 40 kV, 100 mA for a Cu-target tube and a graphite monochromator. Simulation of the XRPD spectrum was carried out by the single-crystal data and diffraction-crystal module of the Mercury (Hg) program available free of charge *via* the Internet at <http://www.iucr.org>. IR spectra were measured in the range of 400-4000  $\text{cm}^{-1}$  on a Tensor 27 OPUS FT-IR spectrometer using KBr pellets (Bruker, German). Magnetic susceptibility was measured by a Quantum Design MPMS superconducting quantum interference device (SQUID). Diamagnetic corrections were estimated by using Pascal constants and background corrections by experimental measurement on sample holders.

### X-ray Crystallography.

X-ray single-crystal diffraction data were collected on a SCX-Mini diffractometer at 293(2) K (for **1**) and a Rigaku RAXIS-RAPID diffractometer at 113(2) K (for **2** and **3**) with Mo-K $\alpha$  radiation ( $\lambda = 0.71073 \text{ \AA}$ ) by  $\omega$  scan mode. The program *Crystalclear*<sup>S2</sup> was used for the integration of the diffraction profiles. The structures were solved by direct method using the SHELXS program of the SHELXTL package and refined by full-matrix least-squares methods with SHELXL (semi-empirical absorption corrections were applied by using the SADABS program).<sup>S3</sup> The non-hydrogen atoms were located in successive difference Fourier syntheses and refined with anisotropic thermal parameters on  $F^2$ . All hydrogen atoms were generated theoretically at the specific atoms and refined isotropically with fixed thermal factors. The selected bond lengths and angles are given in Tables S1-S3 (ESI).

### References

- S1. (a) M. K. Johnson, D. B. Powell and R. D. Cannon, *Spectrochim. Acta.*, 1981, **37**, 995; (b) A. M. Bond, R. J. H. Clark, D. G. Humphrey, P. Panayiotopoulos, B. W. Skelton and A. H. White, *J. Chem. Soc., Dalton Trans.*, 1998, 1845.
- S2. Rigaku, Process-Auto; Rigaku Americas Corporation: The Woodlands, Texas, 1998.
- S3. G. M. Sheldrick, *SHELXL97, Program for Crystal Structure Refinement*; University of Göttingen: Göttingen, Germany, 1997.

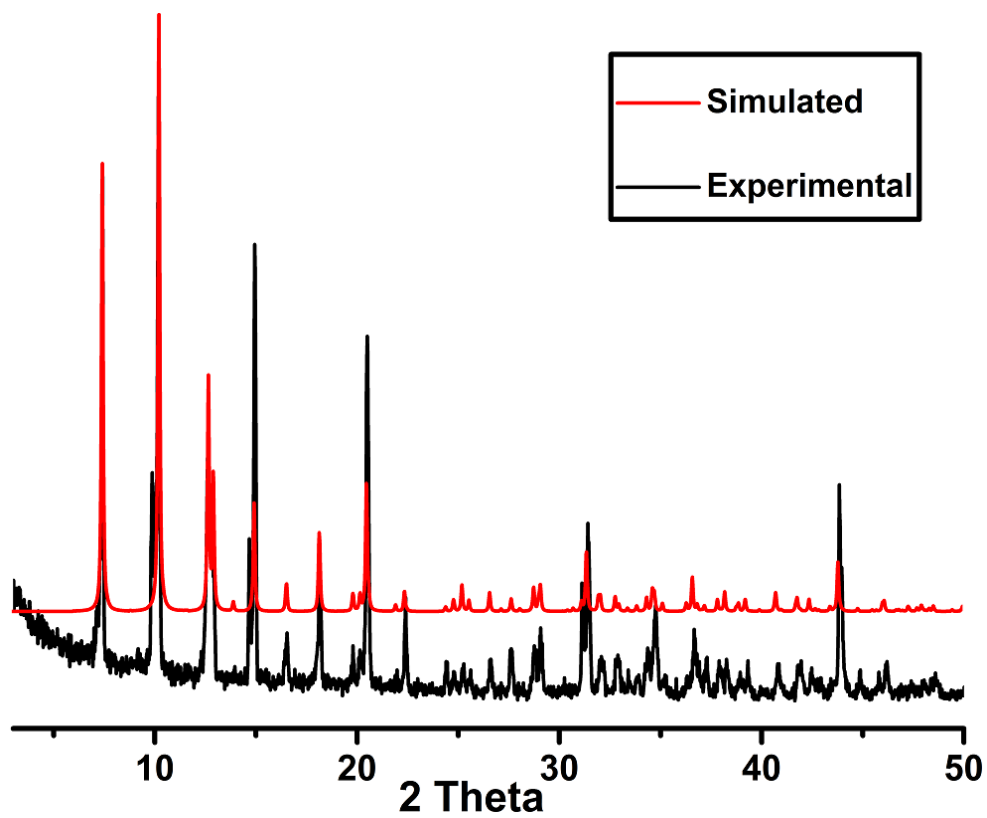

**Fig. S1** X-ray powder diffraction patterns of **1**.

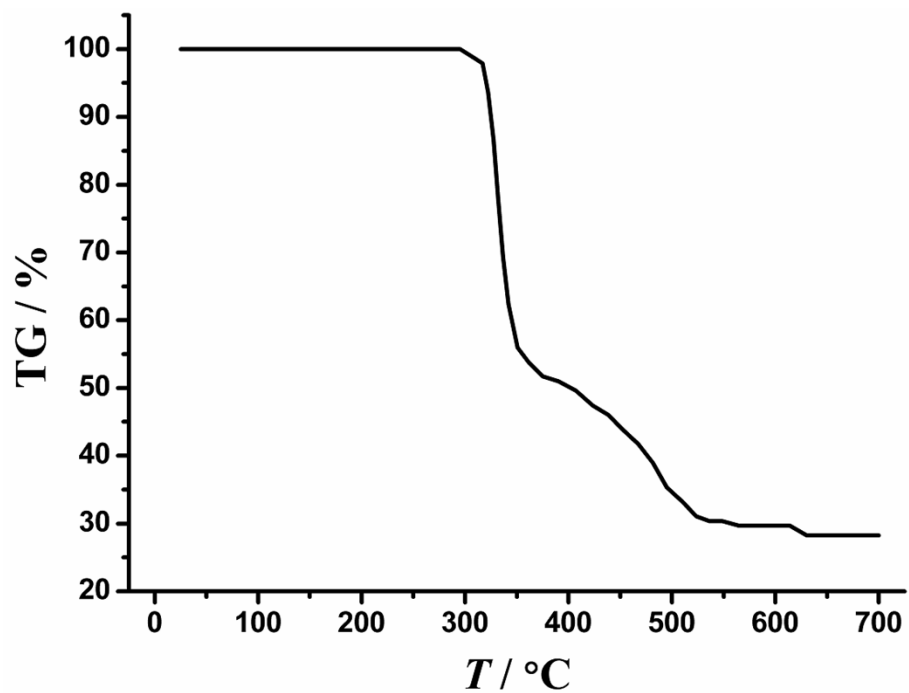

(a)

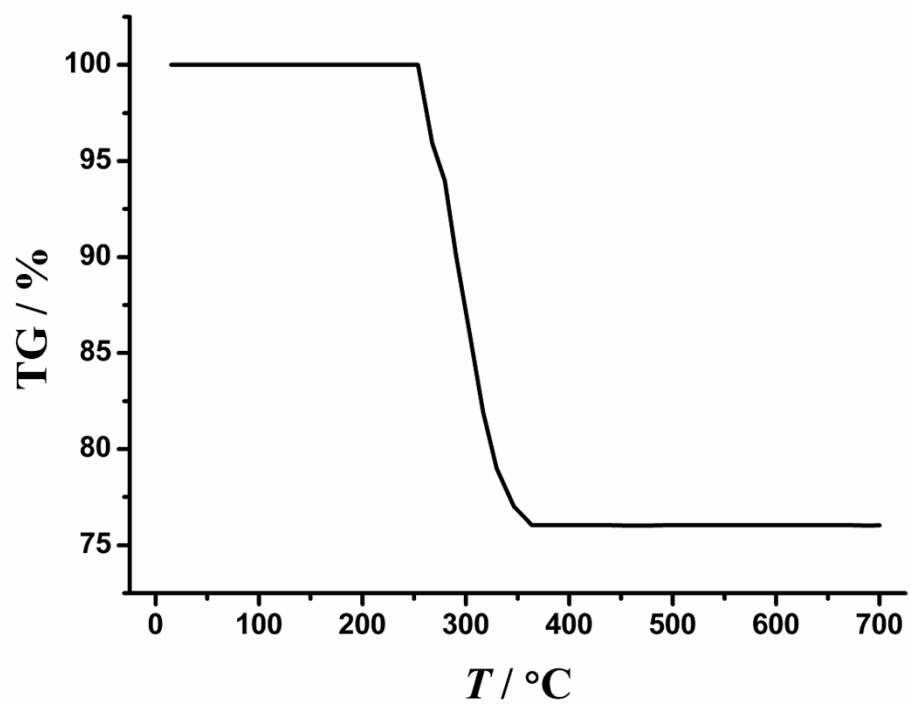

(b)

Fig. S2 TGA curves for 2 and 3.

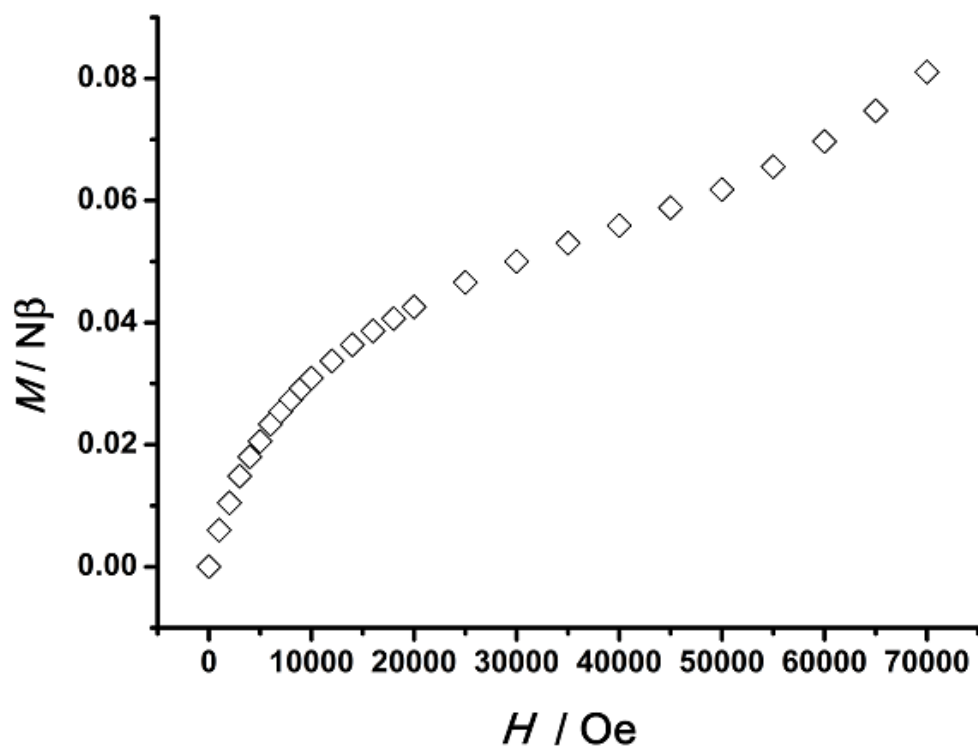

**Fig. S3** The  $M$  vs.  $H$  curve of **1**.

**Table S1.** Selected bond lengths (Å) and angles (°) for complex **1**<sup>a</sup>

|                         |            |                                        |            |
|-------------------------|------------|----------------------------------------|------------|
| Fe1—O1                  | 1.923(4)   | Fe1—O3 <sup>#1</sup>                   | 2.033(3)   |
| Fe1—O3                  | 1.990(3)   | Fe1—O2 <sup>#2</sup>                   | 2.068(3)   |
| Fe1—O2                  | 1.993(3)   | Fe1—N1                                 | 2.211(4)   |
| O1—Fe1—O3               | 93.27(15)  | O2—Fe1—O2 <sup>#2</sup>                | 100.9(2)   |
| O1—Fe1—O2               | 106.56(15) | O3 <sup>#1</sup> —Fe1—O2 <sup>#2</sup> | 92.88(14)  |
| O3—Fe1—O2               | 96.43(14)  | O1—Fe1—N1                              | 80.17(16)  |
| O1—Fe1—O3 <sup>#1</sup> | 102.91(16) | O3—Fe1—N1                              | 109.25(15) |
| O3—Fe1—O3 <sup>#1</sup> | 163.26(19) | O2—Fe1—N1                              | 153.20(14) |
| O2—Fe1—O3 <sup>#1</sup> | 75.05(13)  | O3 <sup>#1</sup> —Fe1—N1               | 78.16(14)  |
| O1—Fe1—O2 <sup>#2</sup> | 151.05(15) | O2 <sup>#2</sup> —Fe1—N1               | 79.54(15)  |
| O3—Fe1—O2 <sup>#2</sup> | 74.34(13)  |                                        |            |

<sup>a</sup>Symmetry codes: #1: x-y, x, -z+1; #2: y, -x+y, -z+1.

**Table S2.** Selected bond lengths (Å) and angles (°) for complex **2**

|         |           |          |           |
|---------|-----------|----------|-----------|
| Fe1—O4  | 1.884(11) | Fe8—O18  | 2.041(11) |
| Fe1—O6  | 1.920(10) | Fe8—O20  | 2.040(10) |
| Fe1—O7  | 1.929(10) | Fe8—O25  | 2.057(11) |
| Fe1—O5  | 1.966(11) | Fe9—O3   | 1.922(10) |
| Fe1—N1  | 2.269(12) | Fe9—O16  | 2.005(11) |
| Fe2—O1  | 1.984(11) | Fe9—O17  | 2.020(10) |
| Fe2—O8  | 2.014(11) | Fe9—O18  | 2.029(10) |
| Fe2—O9  | 2.029(10) | Fe9—O2   | 2.146(10) |
| Fe2—O7  | 2.037(10) | Fe9—N5   | 2.264(14) |
| Fe2—O2  | 2.180(11) | Fe10—O21 | 1.908(11) |
| Fe2—N2  | 2.256(13) | Fe10—O17 | 1.931(11) |
| Fe3—O1  | 1.905(10) | Fe10—O20 | 1.981(12) |
| Fe3—O26 | 1.957(11) | Fe10—O19 | 1.989(10) |
| Fe3—O13 | 2.000(10) | Fe10—N6  | 2.254(13) |
| Fe3—O6  | 2.049(10) | Fe7—O3   | 1.938(10) |
| Fe3—O8  | 2.091(11) | Fe7—O30  | 1.996(11) |
| Fe3—O22 | 2.120(10) | Fe7—O11  | 2.012(10) |
| Fe4—O1  | 1.895(11) | Fe7—O15  | 2.020(10) |
| Fe4—O28 | 1.951(12) | Fe7—O24  | 2.073(10) |
| Fe4—O14 | 2.026(9)  | Fe7—O19  | 2.099(10) |
| Fe4—O10 | 2.075(10) | Fe8—O3   | 1.945(10) |
| Fe4—O23 | 2.098(10) | Fe8—O32  | 1.996(12) |
| Fe4—O5  | 2.131(10) | Fe8—O12  | 2.024(10) |
| Fe5—O11 | 1.984(10) | Fe5—N3   | 2.177(11) |
| Fe5—O2  | 1.989(10) | Fe6—O13  | 1.983(11) |
| Fe5—O12 | 2.000(10) | Fe6—O14  | 1.990(10) |
| Fe5—O9  | 2.022(10) | Fe6—O2   | 2.023(11) |
| Fe5—O10 | 2.055(10) | Fe6—O16  | 2.060(10) |

|             |           |              |           |
|-------------|-----------|--------------|-----------|
| Fe6—N4      | 2.231(12) | Fe6—O15      | 2.068(10) |
| O4—Fe1—O6   | 108.9(5)  | O32—Fe8—O12  | 96.4(5)   |
| O4—Fe1—O7   | 92.6(5)   | O3—Fe8—O18   | 76.8(4)   |
| O6—Fe1—O7   | 104.9(5)  | O32—Fe8—O18  | 100.5(5)  |
| O4—Fe1—O5   | 124.1(5)  | O12—Fe8—O18  | 92.2(4)   |
| O6—Fe1—O5   | 118.7(5)  | O3—Fe8—O20   | 83.9(4)   |
| O7—Fe1—O5   | 101.3(5)  | O32—Fe8—O20  | 90.6(5)   |
| O4—Fe1—N1   | 81.9(5)   | O12—Fe8—O20  | 170.2(5)  |
| O6—Fe1—N1   | 81.3(5)   | O18—Fe8—O20  | 93.3(5)   |
| O7—Fe1—N1   | 172.9(4)  | O3—Fe8—O25   | 94.6(4)   |
| O5—Fe1—N1   | 78.3(5)   | O32—Fe8—O25  | 88.3(5)   |
| O1—Fe2—O8   | 77.9(4)   | O12—Fe8—O25  | 85.8(4)   |
| O1—Fe2—O9   | 133.3(4)  | O18—Fe8—O25  | 171.2(4)  |
| O8—Fe2—O9   | 148.0(4)  | O20—Fe8—O25  | 87.6(5)   |
| O1—Fe2—O7   | 80.4(4)   | O3—Fe9—O16   | 134.0(5)  |
| O8—Fe2—O7   | 102.6(4)  | O3—Fe9—O17   | 79.9(4)   |
| O9—Fe2—O7   | 91.9(4)   | O16—Fe9—O17  | 90.6(4)   |
| O1—Fe2—O2   | 90.2(4)   | O3—Fe9—O18   | 77.6(4)   |
| O8—Fe2—O2   | 97.6(4)   | O16—Fe9—O18  | 147.8(4)  |
| O9—Fe2—O2   | 77.9(4)   | O17—Fe9—O18  | 103.7(4)  |
| O7—Fe2—O2   | 155.3(4)  | O3—Fe9—O2    | 91.6(4)   |
| O1—Fe2—N2   | 144.9(5)  | O16—Fe9—O2   | 78.7(4)   |
| O8—Fe2—N2   | 79.4(5)   | O17—Fe9—O2   | 155.3(4)  |
| O9—Fe2—N2   | 75.6(5)   | O18—Fe9—O2   | 96.9(4)   |
| O7—Fe2—N2   | 78.8(4)   | O3—Fe9—N5    | 141.6(5)  |
| O2—Fe2—N2   | 119.2(4)  | O16—Fe9—N5   | 77.1(5)   |
| O1—Fe3—O26  | 175.1(5)  | O17—Fe9—N5   | 77.8(4)   |
| O1—Fe3—O13  | 88.9(4)   | O18—Fe9—N5   | 77.9(5)   |
| O26—Fe3—O13 | 95.4(4)   | O2—Fe9—N5    | 120.3(4)  |
| O1—Fe3—O6   | 84.8(4)   | O21—Fe10—O17 | 90.9(5)   |
| O26—Fe3—O6  | 91.3(4)   | O21—Fe10—O20 | 107.9(6)  |
| O13—Fe3—O6  | 170.7(5)  | O17—Fe10—O20 | 105.2(5)  |
| O1—Fe3—O8   | 77.8(4)   | O21—Fe10—O19 | 121.7(5)  |
| O26—Fe3—O8  | 99.5(5)   | O17—Fe10—O19 | 102.9(5)  |
| O13—Fe3—O8  | 92.3(4)   | O20—Fe10—O19 | 121.7(5)  |
| O6—Fe3—O8   | 93.1(4)   | O21—Fe10—N6  | 80.2(4)   |
| O1—Fe3—O22  | 94.0(4)   | O17—Fe10—N6  | 170.8(4)  |
| O26—Fe3—O22 | 88.7(5)   | O20—Fe10—N6  | 79.8(5)   |
| O13—Fe3—O22 | 87.5(4)   | O19—Fe10—N6  | 80.3(5)   |
| O6—Fe3—O22  | 86.1(5)   | O13—Fe6—O14  | 96.6(4)   |
| O8—Fe3—O22  | 171.8(4)  | O13—Fe6—O2   | 115.4(4)  |
| O1—Fe4—O28  | 168.6(5)  | O14—Fe6—O2   | 97.2(4)   |
| O1—Fe4—O14  | 88.3(4)   | O13—Fe6—O16  | 86.7(4)   |
| O28—Fe4—O14 | 98.2(5)   | O14—Fe6—O16  | 176.5(4)  |

|             |          |             |          |
|-------------|----------|-------------|----------|
| O1—Fe4—O10  | 82.0(4)  | O2—Fe6—O16  | 80.3(4)  |
| O28—Fe4—O10 | 88.5(5)  | O13—Fe6—O15 | 148.3(4) |
| O14—Fe4—O10 | 90.8(4)  | O14—Fe6—O15 | 100.7(4) |
| O1—Fe4—O23  | 98.9(4)  | O2—Fe6—O15  | 88.7(4)  |
| O28—Fe4—O23 | 90.8(5)  | O16—Fe6—O15 | 76.9(4)  |
| O14—Fe4—O23 | 86.7(4)  | O13—Fe6—N4  | 78.6(4)  |
| O10—Fe4—O23 | 177.4(4) | O14—Fe6—N4  | 81.2(4)  |
| O1—Fe4—O5   | 84.1(4)  | O2—Fe6—N4   | 166.0(5) |
| O28—Fe4—O5  | 90.4(5)  | O16—Fe6—N4  | 100.5(5) |
| O14—Fe4—O5  | 169.8(4) | O15—Fe6—N4  | 78.0(4)  |
| O10—Fe4—O5  | 94.9(4)  | O3—Fe7—O30  | 173.1(5) |
| O23—Fe4—O5  | 87.6(4)  | O3—Fe7—O11  | 90.5(4)  |
| O11—Fe5—O2  | 94.4(4)  | O30—Fe7—O11 | 93.0(4)  |
| O11—Fe5—O12 | 97.0(5)  | O3—Fe7—O15  | 81.9(4)  |
| O2—Fe5—O12  | 113.7(4) | O30—Fe7—O15 | 92.1(5)  |
| O11—Fe5—O9  | 176.6(5) | O11—Fe7—O15 | 91.2(4)  |
| O2—Fe5—O9   | 82.6(4)  | O3—Fe7—O24  | 95.5(4)  |
| O12—Fe5—O9  | 85.7(4)  | O30—Fe7—O24 | 90.6(5)  |
| O11—Fe5—O10 | 98.7(4)  | O11—Fe7—O24 | 87.5(4)  |
| O2—Fe5—O10  | 91.8(4)  | O15—Fe7—O24 | 177.1(4) |
| O12—Fe5—O10 | 148.7(4) | O3—Fe7—O19  | 82.8(4)  |
| O9—Fe5—O10  | 79.7(4)  | O30—Fe7—O19 | 94.6(4)  |
| O11—Fe5—N3  | 82.6(4)  | O11—Fe7—O19 | 169.4(4) |
| O2—Fe5—N3   | 167.9(5) | O15—Fe7—O19 | 95.9(4)  |
| O12—Fe5—N3  | 78.4(4)  | O24—Fe7—O19 | 85.1(4)  |
| O9—Fe5—N3   | 99.9(4)  | O3—Fe8—O32  | 173.7(5) |
| O10—Fe5—N3  | 77.1(4)  | O3—Fe8—O12  | 89.4(4)  |



**Table S3.** Selected bond lengths (Å) and angles (°) for complex **3**

|             |            |              |           |
|-------------|------------|--------------|-----------|
| O18—Fe2     | 2.061(6)   | Fe8—O25      | 1.940(7)  |
| Fe1—O4      | 1.989(6)   | Fe8—O24      | 1.956(6)  |
| Fe1—O2      | 1.991(6)   | Fe8—N5       | 2.257(7)  |
| Fe1—O1      | 2.000(6)   | Fe9—O5       | 1.982(6)  |
| Fe1—O3      | 2.007(6)   | Fe9—O11      | 1.986(6)  |
| Fe1—O5      | 2.143(6)   | Fe9—O12      | 1.993(6)  |
| Fe1—N1      | 2.277(8)   | Fe9—O22      | 2.048(6)  |
| Fe2—O19     | 1.914(6)   | Fe9—O13      | 2.066(6)  |
| Fe2—O15     | 2.003(6)   | Fe9—N6       | 2.201(7)  |
| Fe2—O24     | 2.047(6)   | Fe10—O19     | 1.913(6)  |
| Fe2—O20     | 2.088(6)   | Fe10—O16     | 1.993(6)  |
| Fe2—Cl1     | 2.326(3)   | Fe10—O13     | 2.057(6)  |
| Fe3—O19     | 1.969(6)   | Fe10—O25     | 2.059(6)  |
| Fe3—O20     | 1.992(6)   | Fe10—O17     | 2.091(6)  |
| Fe3—O21     | 1.996(6)   | Fe10—Cl4     | 2.342(3)  |
| Fe3—O22     | 1.999(6)   | Fe5—Cl2      | 2.324(3)  |
| Fe3—O5      | 2.164(6)   | Fe6—O4       | 1.887(6)  |
| Fe3—N2      | 2.293(8)   | Fe6—O12      | 1.999(6)  |
| Fe3—Fe9     | 2.9270(18) | Fe6—O14      | 2.056(6)  |
| Fe4—O5      | 1.992(6)   | Fe6—O10      | 2.072(6)  |
| Fe4—O16     | 1.992(6)   | Fe6—O7       | 2.073(6)  |
| Fe4—O15     | 2.012(6)   | Fe6—Cl3      | 2.359(3)  |
| Fe4—O1      | 2.026(6)   | Fe7—O6       | 1.884(6)  |
| Fe4—O14     | 2.064(6)   | Fe7—O2       | 1.945(6)  |
| Fe4—N3      | 2.203(7)   | Fe7—O7       | 1.949(7)  |
| Fe5—O4      | 1.937(6)   | Fe7—O8       | 1.961(6)  |
| Fe5—O11     | 2.002(6)   | Fe7—N4       | 2.267(8)  |
| Fe5—O8      | 2.029(6)   | Fe8—O23      | 1.879(6)  |
| Fe5—O3      | 2.073(6)   | Fe8—O21      | 1.935(6)  |
| Fe5—O9      | 2.081(6)   |              |           |
| O18—Fe2—O20 | 171.8(3)   | O16—Fe10—Cl4 | 95.96(19) |
| O4—Fe1—O2   | 80.8(2)    | O13—Fe10—Cl4 | 91.53(18) |
| O4—Fe1—O1   | 133.8(3)   | O25—Fe10—Cl4 | 90.49(19) |
| O2—Fe1—O1   | 90.7(2)    | O17—Fe10—Cl4 | 91.76(19) |
| O4—Fe1—O3   | 78.3(2)    | O3—Fe1—N1    | 77.8(3)   |
| O2—Fe1—O3   | 104.5(2)   | O5—Fe1—N1    | 120.4(2)  |
| O1—Fe1—O3   | 146.9(3)   | O19—Fe2—O15  | 86.8(3)   |
| O4—Fe1—O5   | 90.2(2)    | O19—Fe2—O24  | 84.3(3)   |
| O2—Fe1—O5   | 153.9(3)   | O15—Fe2—O24  | 168.5(3)  |
| O1—Fe1—O5   | 77.9(2)    | O19—Fe2—O18  | 94.7(3)   |
| O3—Fe1—O5   | 97.6(2)    | O15—Fe2—O18  | 85.5(3)   |
| O4—Fe1—N1   | 143.1(3)   | O24—Fe2—O18  | 87.9(3)   |
| O2—Fe1—N1   | 78.5(3)    | O19—Fe2—O20  | 77.1(2)   |

---

|             |            |              |           |
|-------------|------------|--------------|-----------|
| O1—Fe1—N1   | 76.7(3)    | O15—Fe2—O20  | 94.5(2)   |
| O24—Fe2—O20 | 90.7(2)    | O4—Fe5—O11   | 87.8(2)   |
| O21—Fe3—O5  | 154.0(3)   | O19—Fe3—O20  | 78.2(3)   |
| O22—Fe3—O5  | 78.1(2)    | O19—Fe3—O21  | 81.6(2)   |
| O19—Fe3—N2  | 142.9(3)   | O20—Fe3—O21  | 103.8(3)  |
| O20—Fe3—N2  | 77.2(3)    | O19—Fe3—O22  | 135.3(3)  |
| O21—Fe3—N2  | 77.8(3)    | O20—Fe3—O22  | 145.6(3)  |
| O22—Fe3—N2  | 76.1(3)    | O21—Fe3—O22  | 91.3(2)   |
| O5—Fe3—N2   | 121.4(3)   | O19—Fe3—O5   | 89.3(2)   |
| O5—Fe4—O16  | 96.8(2)    | O20—Fe3—O5   | 98.0(2)   |
| O5—Fe4—O15  | 115.0(3)   | O11—Fe5—O8   | 170.2(3)  |
| O16—Fe4—O15 | 97.0(3)    | O4—Fe5—O3    | 77.9(2)   |
| O5—Fe4—O1   | 80.9(2)    | O11—Fe5—O3   | 93.5(2)   |
| O16—Fe4—O1  | 176.7(2)   | O8—Fe5—O3    | 90.8(2)   |
| O15—Fe4—O1  | 86.1(2)    | O4—Fe5—O9    | 93.9(3)   |
| O5—Fe4—O14  | 89.4(2)    | O11—Fe5—O9   | 86.1(2)   |
| O16—Fe4—O14 | 98.2(2)    | O8—Fe5—O9    | 88.3(2)   |
| O15—Fe4—O14 | 149.3(2)   | O3—Fe5—O9    | 171.8(2)  |
| O1—Fe4—O14  | 79.5(2)    | O4—Fe5—Cl2   | 172.1(2)  |
| O5—Fe4—N3   | 166.6(3)   | O11—Fe5—Cl2  | 94.68(19) |
| O16—Fe4—N3  | 82.0(3)    | O8—Fe5—Cl2   | 93.73(19) |
| O15—Fe4—N3  | 78.3(3)    | O3—Fe5—Cl2   | 94.40(18) |
| O1—Fe4—N3   | 99.7(3)    | O9—Fe5—Cl2   | 93.80(19) |
| O14—Fe4—N3  | 77.6(3)    | O4—Fe5—O8    | 84.6(2)   |
| O4—Fe6—O12  | 89.5(3)    | O2—Fe7—O7    | 101.7(3)  |
| O4—Fe6—O14  | 82.6(3)    | O6—Fe7—O8    | 109.4(3)  |
| O12—Fe6—O14 | 89.6(2)    | O2—Fe7—O8    | 104.6(3)  |
| O4—Fe6—O10  | 95.6(3)    | O7—Fe7—O8    | 122.3(3)  |
| O12—Fe6—O10 | 86.7(2)    | O6—Fe7—N4    | 80.1(3)   |
| O14—Fe6—O10 | 175.9(2)   | O2—Fe7—N4    | 170.8(3)  |
| O4—Fe6—O7   | 83.0(3)    | O7—Fe7—N4    | 81.0(3)   |
| O12—Fe6—O7  | 170.1(2)   | O8—Fe7—N4    | 80.8(3)   |
| O14—Fe6—O7  | 95.9(2)    | O23—Fe8—O21  | 91.9(3)   |
| O10—Fe6—O7  | 87.5(2)    | O23—Fe8—O25  | 118.5(3)  |
| O4—Fe6—Cl3  | 172.29(19) | O21—Fe8—O25  | 103.6(3)  |
| O12—Fe6—Cl3 | 96.36(19)  | O7—Fe6—Cl3   | 91.63(19) |
| O14—Fe6—Cl3 | 92.43(19)  | O6—Fe7—O2    | 91.0(3)   |
| O10—Fe6—Cl3 | 89.71(19)  | O6—Fe7—O7    | 120.5(3)  |
| O23—Fe8—O24 | 113.1(3)   | O19—Fe10—O16 | 90.6(3)   |
| O21—Fe8—O24 | 102.1(3)   | O19—Fe10—O13 | 82.1(2)   |
| O25—Fe8—O24 | 120.6(3)   | O16—Fe10—O13 | 90.7(2)   |
| O23—Fe8—N5  | 80.4(3)    | O19—Fe10—O25 | 83.8(3)   |
| O21—Fe8—N5  | 172.2(3)   | O16—Fe10—O25 | 170.9(3)  |
| O25—Fe8—N5  | 80.9(3)    | O13—Fe10—O25 | 95.5(2)   |
| O24—Fe8—N5  | 80.5(3)    | O19—Fe10—O17 | 94.9(3)   |

---

---

|             |          |              |          |
|-------------|----------|--------------|----------|
| O5—Fe9—O11  | 115.6(3) | O16—Fe10—O17 | 86.5(2)  |
| O5—Fe9—O12  | 96.7(2)  | O13—Fe10—O17 | 175.9(2) |
| O11—Fe9—O12 | 96.1(2)  | O25—Fe10—O17 | 86.9(2)  |
| O5—Fe9—O22  | 81.3(2)  | O19—Fe10—Cl4 | 170.9(2) |
| O11—Fe9—O22 | 85.6(2)  | O22—Fe9—O13  | 79.4(2)  |
| O12—Fe9—O22 | 177.8(2) | O5—Fe9—N6    | 166.6(3) |
| O5—Fe9—O13  | 89.6(2)  | O11—Fe9—N6   | 77.8(3)  |
| O11—Fe9—O13 | 148.3(2) | O12—Fe9—N6   | 81.4(3)  |
| O12—Fe9—O13 | 99.7(2)  | O22—Fe9—N6   | 100.4(3) |

---
